# Supplementary material for: Improved visible-light absorbance of monolayer MoS2 on AlN substrate and its angle-dependent electronic structures
Source: Royal Society of Chemistry journal article supplement (doi:10.1039/c8cp03908a), 2018-01-01
Supplement: c8cp03908a9.pdf [file c8cp03908a9.pdf]

**Supplementary Information for**  
**“Improved visible-light absorbance of monolayer MoS<sub>2</sub> on AlN**  
**substrate and angle-dependent electronic structures”**

Feifei Li<sup>2</sup>, Changmin Shi<sup>1,\*</sup>, Dongchao Wang<sup>1</sup>, Guangliang Cui<sup>1</sup>, Pinhua Zhang<sup>1</sup>, Li Lv<sup>1</sup> and Li

Chen<sup>1</sup>

<sup>1</sup>Institute of Condensed Matter Physics, School of Physics and Electric Engineering, Linyi

University, Linyi 276000, China

<sup>2</sup>State-owned Assets and Laboratory Management, Linyi University, Linyi 276000, China

E-mail addresses: scm ff@163.com, shichangmin@lyu.edu.cn (C. M. Shi).

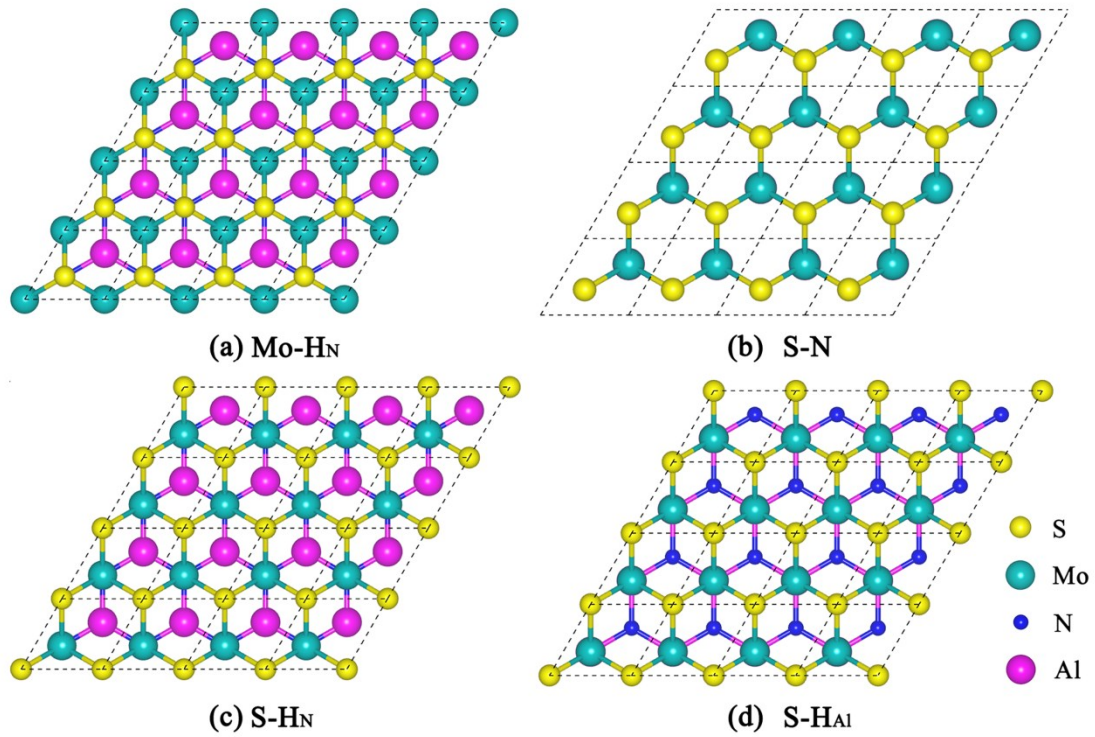

Fig. 1S The top views of (a) Mo-H<sub>N</sub>, (b) S-N, (c) S-H<sub>N</sub> and (d) S-H<sub>Al</sub> stacked MoS<sub>2</sub>/AlN hetero-structures with lattice match model.

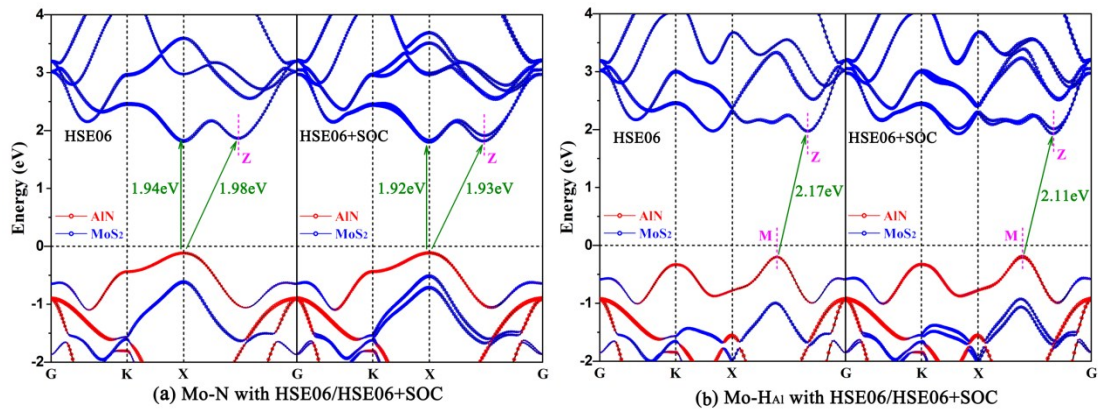

Fig. 2S The electronic band structures of (a) Mo-N and (b) Mo-H<sub>N</sub> stacked hetero-structures with HSE06 and HSE06-SOC formations.

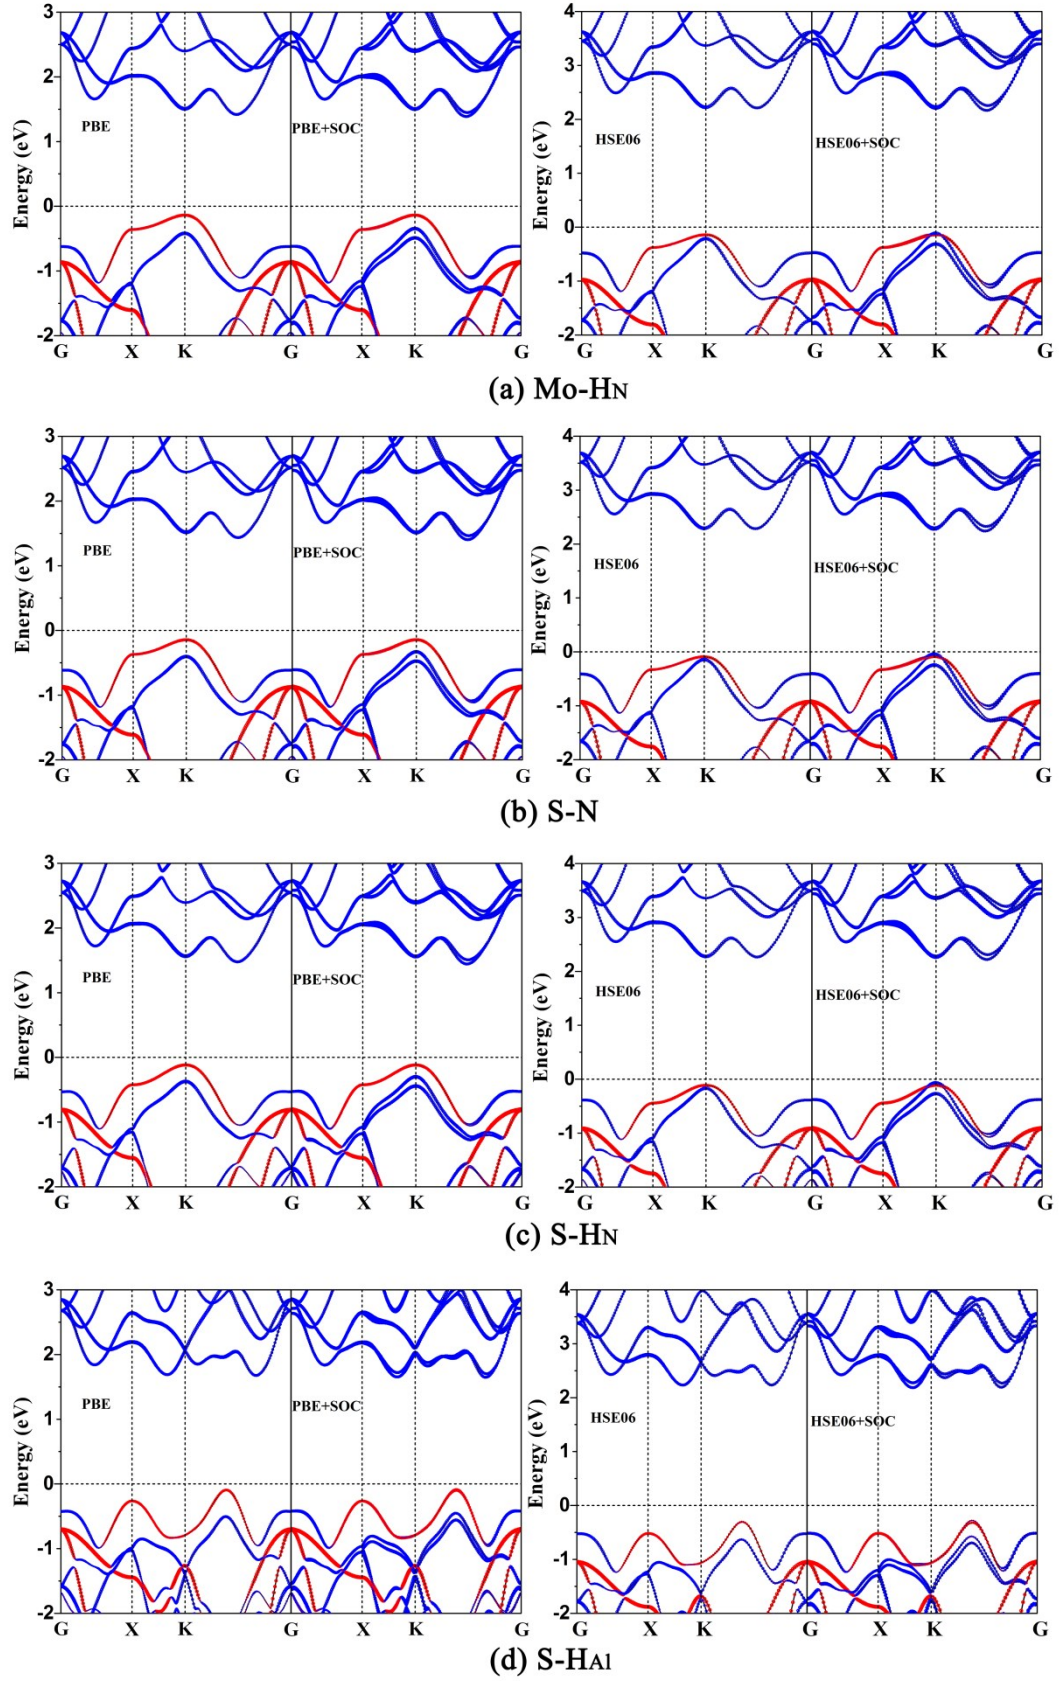

Fig. 3S The electronic band structures of (a) Mo-H<sub>N</sub>, (b) S-N, (c) S-H<sub>N</sub> and (d) S-H<sub>Al1</sub> stacked MoS<sub>2</sub>/AlN hetero-structures with lattice match model.

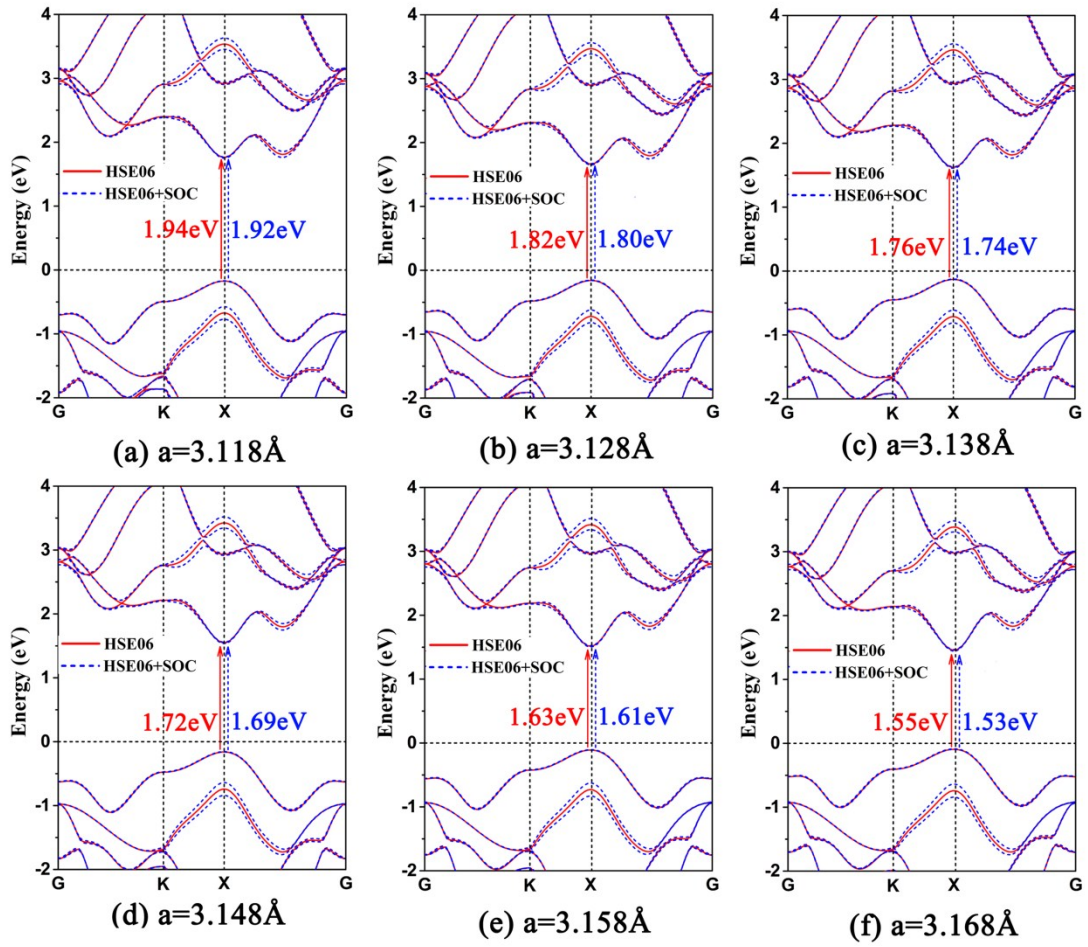

Fig. 4S The electronic band structures of  $\text{MoS}_2/\text{AlN}$  hetero-structures with HSE06 and HSE06-SOC formations in Mo-N stacking configurations for different lattice constants from  $a = 3.118\text{\AA}$  to  $a = 3.168\text{\AA}$ .



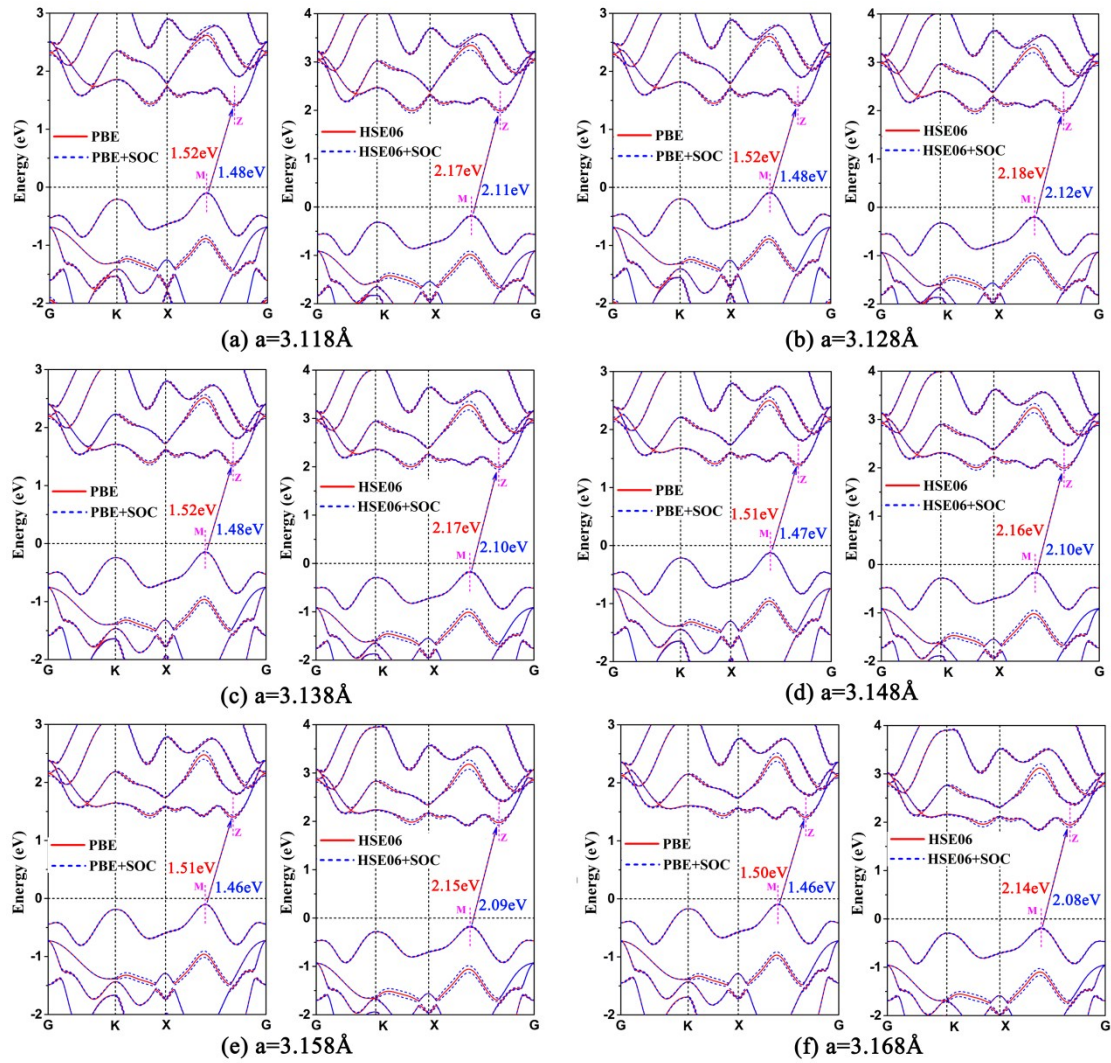

Fig. 5S The dependences of electronic band structures of Mo-H<sub>Al</sub> stacked MoS<sub>2</sub>/AlN hetero-structures on strains from  $a=3.118\text{\AA}$  to  $a=3.168\text{\AA}$ .

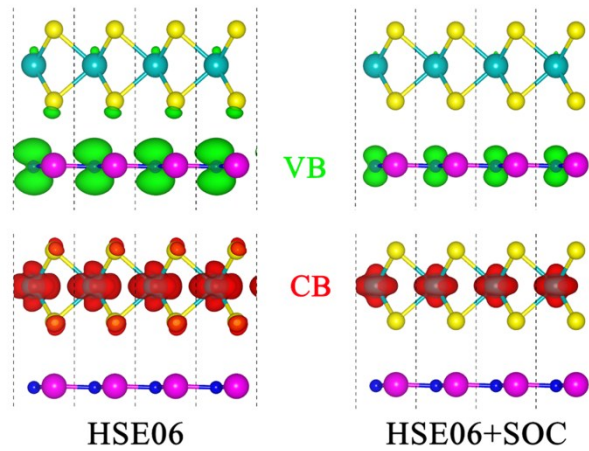

Fig. 6S The partial decomposed charge density of VB and CB of Mo-N stacked MoS<sub>2</sub>/AlN hetero-structures with HSE06 and HSE06-SOC formations.

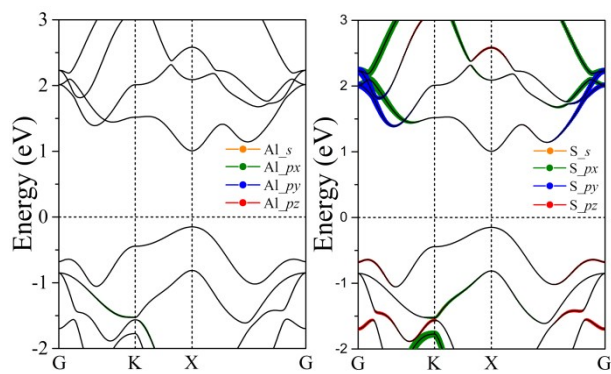

Fig. 7S The partial orbitals of (a) Al atoms with PBE formation and (b) S atoms with PBE formation.
