# Supplementary figures and images for: Improved visible-light absorbance of monolayer MoS2 on AlN substrate and its angle-dependent electronic structures
Source: Royal Society of Chemistry journal article supplement (doi:10.1039/c8cp03908a), 2018-01-01

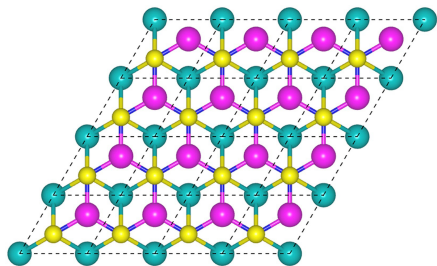

(a) Mo-H<sub>N</sub>

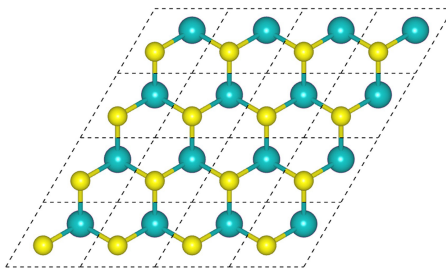

(b) S-N

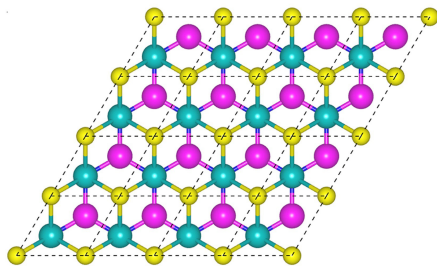

(c) S-H<sub>N</sub>

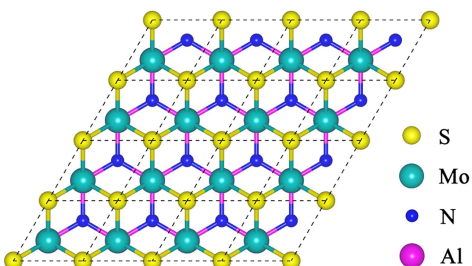

(d) S-H<sub>Al</sub>

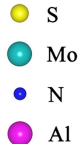

Supplement: c8cp03908a2.pdf [file c8cp03908a2.pdf]

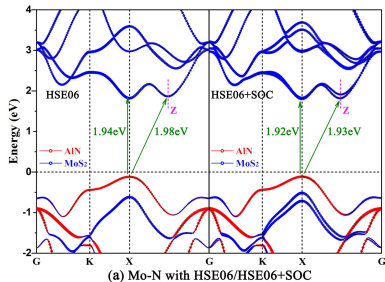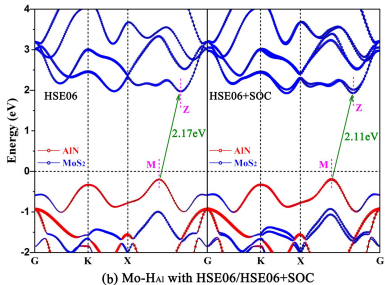

Supplement: c8cp03908a3.pdf [file c8cp03908a3.pdf]

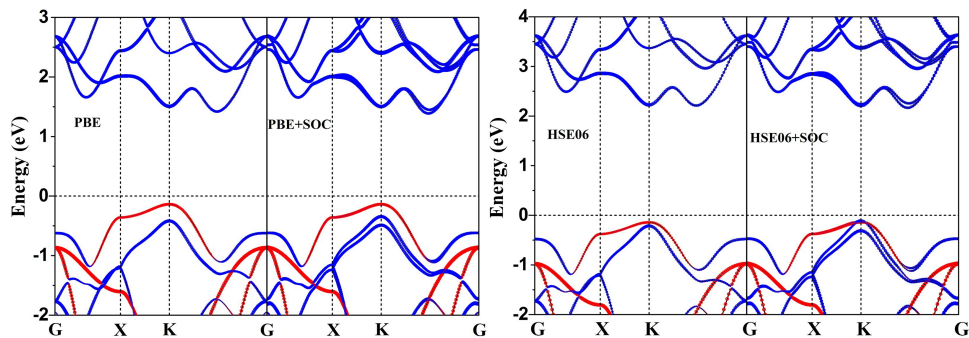

(a) Mo-HN

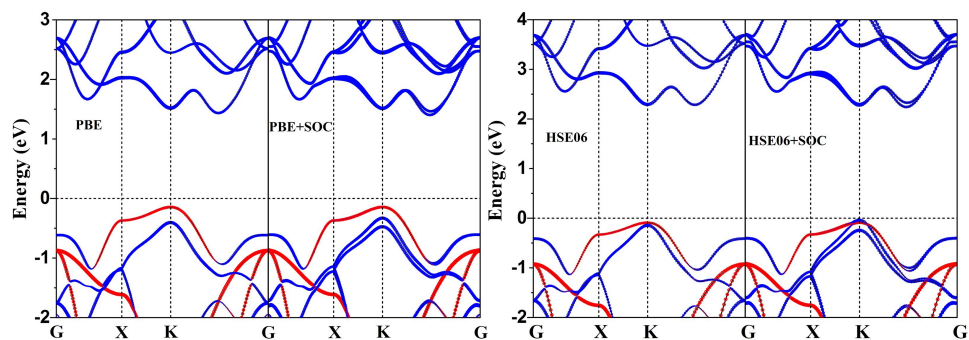

(b) S-N

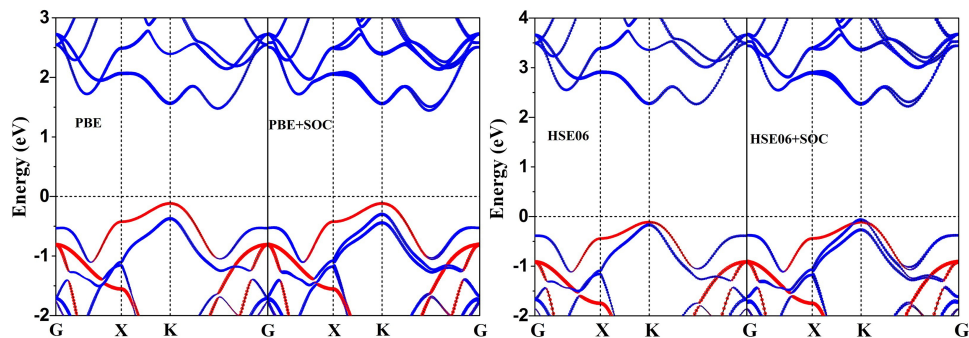

(c) S-HN

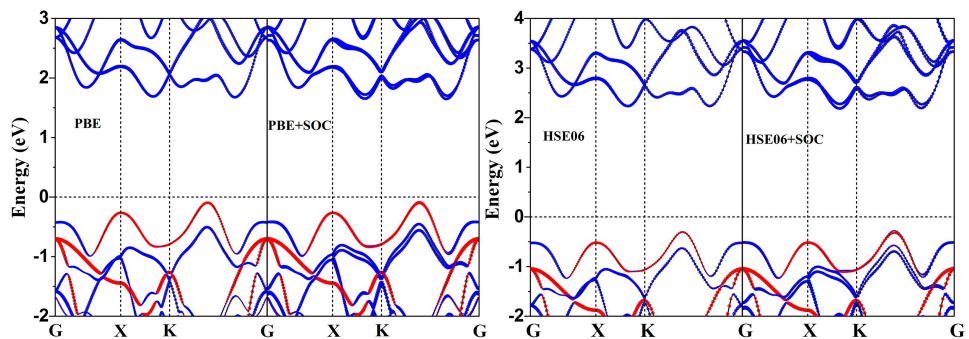

(d) S-HA1

Supplement: c8cp03908a4.pdf [file c8cp03908a4.pdf]

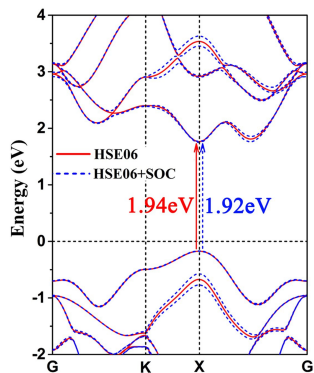

(a)  $a=3.118\text{\AA}$

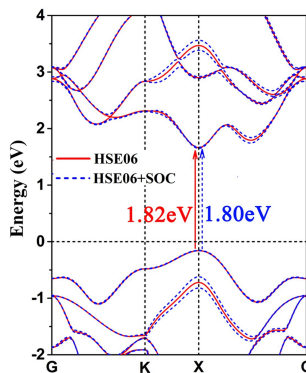

(b)  $a=3.128\text{\AA}$

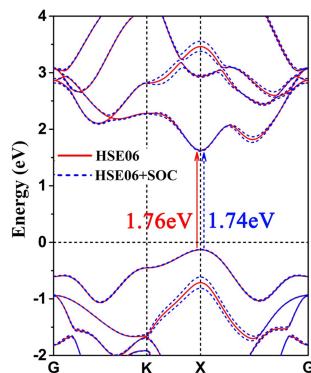

(c)  $a=3.138\text{\AA}$

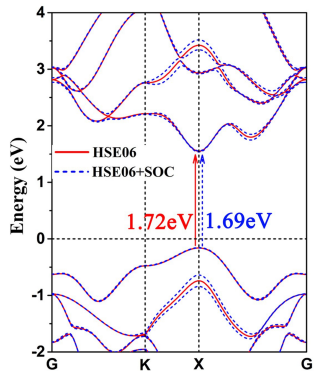

(d)  $a=3.148\text{\AA}$

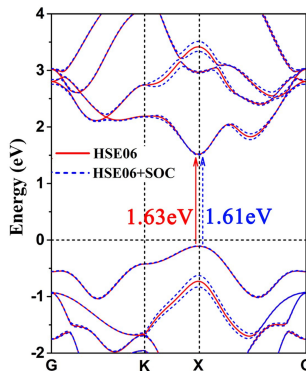

(e)  $a=3.158\text{\AA}$

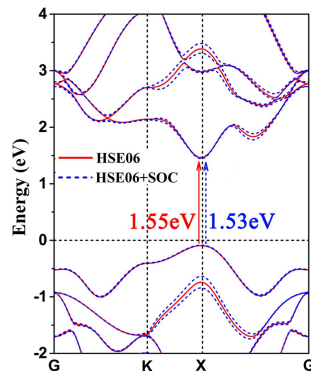

(f)  $a=3.168\text{\AA}$

Supplement: c8cp03908a5.pdf [file c8cp03908a5.pdf]

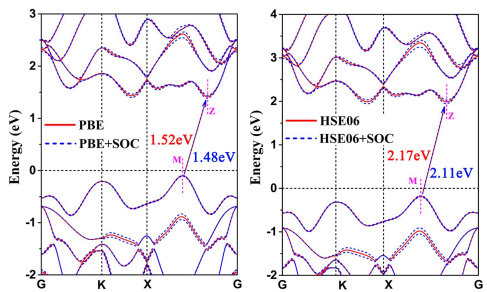

(a)  $a=3.118\text{Å}$

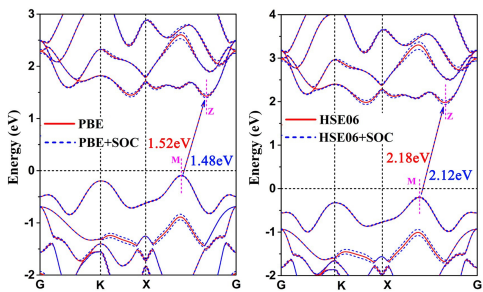

(b)  $a=3.128\text{Å}$

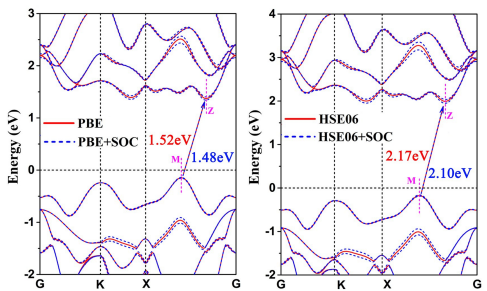

(c)  $a=3.138\text{Å}$

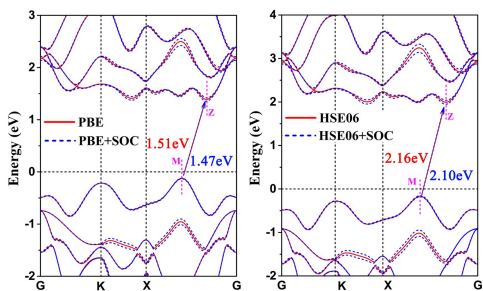

(d)  $a=3.148\text{Å}$

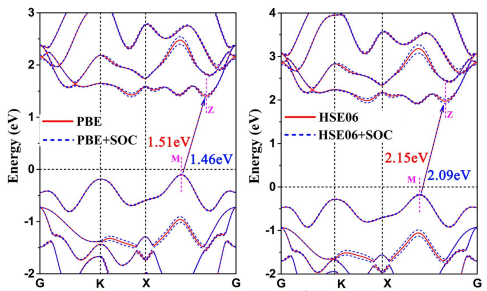

(e)  $a=3.158\text{Å}$

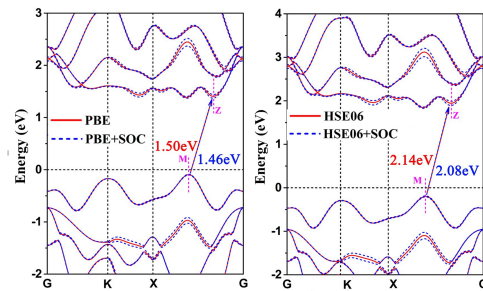

(f)  $a=3.168\text{Å}$

Supplement: c8cp03908a6.pdf [file c8cp03908a6.pdf]

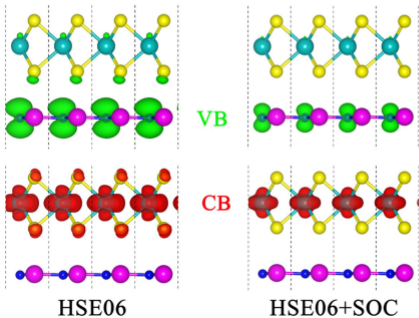

Supplement: c8cp03908a7.pdf [file c8cp03908a7.pdf]

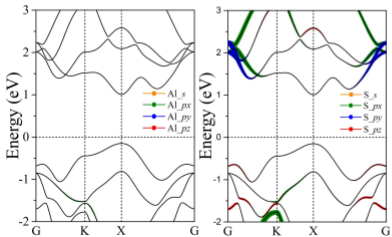

Supplement: c8cp03908a8.pdf [file c8cp03908a8.pdf]
